# Supplementary material
Source: publisher figshare collection journal article supplement (https://acs.figshare.com/ndownloader/files/5905023)
Supplement: Supplementary file 1 [file 5905023]

# Role of Nonbond Interactions in the Glass Transition of Novolac-Type Phenolic Resin: A Molecular Dynamics Study

*Cheng Bian,<sup>†</sup> Shujuan Wang,<sup>\*,†</sup> Yuhong Liu,<sup>‡</sup> Kehe Su,<sup>§</sup> Xinli Jing<sup>†</sup>*

<sup>†</sup>Department of Applied Chemistry, School of Science and <sup>‡</sup>Department of Chemical Engineering, School of Chemical Engineering and Technology, Xi'an Jiaotong University, No.28, Xianning West Road, Xi'an 710049, China.

<sup>§</sup>Key Laboratory of Space Applied Physics and Chemistry of the Ministry of Education, School of Natural and Applied Sciences, Northwestern Polytechnical University, Xi'an, 710072, China.

## Supporting Information

### Content

|                                                                         |     |
|-------------------------------------------------------------------------|-----|
| I . Structural characterization of novolac resins.....                  | S2  |
| II . Model construction .....                                           | S4  |
| III. Glass transition temperature .....                                 | S7  |
| IV. Nearest coordination numbers of oxygen atoms .....                  | S13 |
| V . Averaged reduced density gradient of frozen end phenolic rings..... | S15 |
| VI. Conformational analyses .....                                       | S16 |

## I . Structural characterization of novolac resins

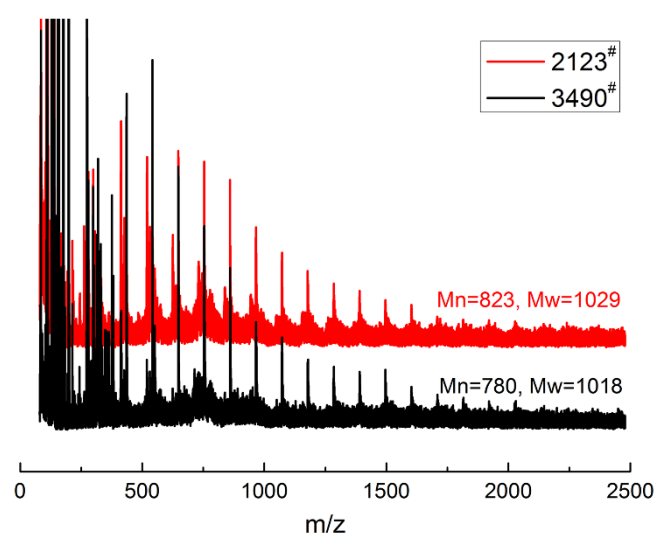

**Figure S1** MALDI-TOF spectra of novolacs

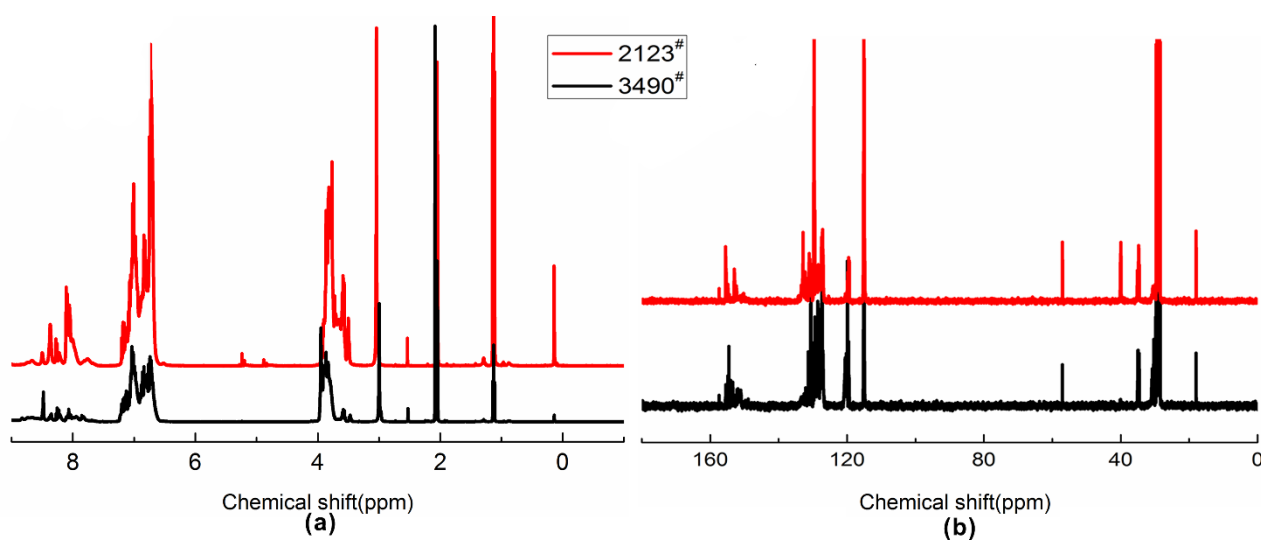

**Figure S2** <sup>1</sup>H NMR (a) and <sup>13</sup>C NMR (b) spectra of novolacs

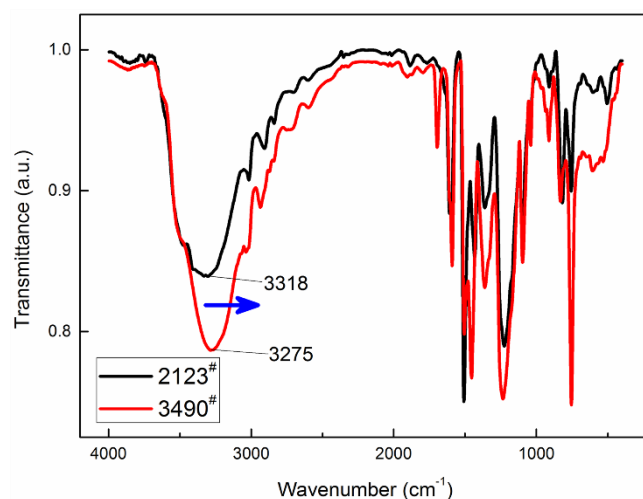

**Figure S3** FTIR spectra of novolacs

**Table S1** Elemental composition of novolacs

| Novolacs          | Content of elements (wt%) |      |       |      |      |       | Atomic ratio |      |      |
|-------------------|---------------------------|------|-------|------|------|-------|--------------|------|------|
|                   | C                         | H    | O     | N    | S    | sum   | C            | H    | O    |
| 2123 <sup>#</sup> | 76.01                     | 5.85 | 17.37 | 0.23 | 0.11 | 99.57 | 6            | 5.48 | 1.03 |
| 3490 <sup>#</sup> | 76.43                     | 5.87 | 16.58 | 0.20 | 0.09 | 99.16 | 6            | 5.44 | 0.98 |

**Table S2** Properties of novolacs

| Novolacs          | Density(g·cm <sup>-3</sup> , 298K) | T <sub>g</sub> (K) | Softening point (K) |
|-------------------|------------------------------------|--------------------|---------------------|
| 3490 <sup>#</sup> | 1.210                              | 324.1              | 378.15              |
| 2123 <sup>#</sup> | 1.196                              | 316.4              | 373.15              |

## II . Model construction

**Table S3** Composition of novolac models

| Model          | Single chain                                      |                  | Bulk model |                |       |                    |                                  |
|----------------|---------------------------------------------------|------------------|------------|----------------|-------|--------------------|----------------------------------|
|                | Formula                                           | Molecular weight | Chains     | Phenolic rings | Atoms | End phenolic rings | Ratio of end/total phenolic ring |
| PhOH           | C <sub>6</sub> H <sub>6</sub> O                   | 94               | 960        | 960            | 12480 | 480                | 1.00                             |
| Boo-2(Bop-2) * | C <sub>13</sub> H <sub>12</sub> O <sub>2</sub>    | 200              | 480        | 960            | 12960 | 480                | 1.00                             |
| Boo-3(Bop-3)   | C <sub>20</sub> H <sub>18</sub> O <sub>3</sub>    | 306              | 300        | 900            | 12300 | 600                | 0.67                             |
| Boo-4(Bop-4)   | C <sub>27</sub> H <sub>24</sub> O <sub>4</sub>    | 412              | 220        | 880            | 12100 | 440                | 0.50                             |
| Boo-6(Bop-6)   | C <sub>41</sub> H <sub>36</sub> O <sub>6</sub>    | 624              | 148        | 888            | 12284 | 296                | 0.33                             |
| Boo-8(Bop-8)   | C <sub>55</sub> H <sub>48</sub> O <sub>8</sub>    | 836              | 120        | 960            | 13320 | 240                | 0.25                             |
| Boo-12(Bop-12) | C <sub>83</sub> H <sub>72</sub> O <sub>12</sub>   | 1260             | 74         | 888            | 12358 | 148                | 0.17                             |
| Boo-16(Bop-16) | C <sub>111</sub> H <sub>96</sub> O <sub>16</sub>  | 1684             | 56         | 896            | 12488 | 112                | 0.13                             |
| Boo-20(Bop-20) | C <sub>139</sub> H <sub>120</sub> O <sub>20</sub> | 2108             | 44         | 880            | 12276 | 88                 | 0.10                             |
| Boo-mix        |                                                   |                  | 129        | 889            | 12453 | 259                | 0.29                             |
| Bop-mix        |                                                   |                  | 121        | 882            | 12348 | 243                | 0.28                             |

\* Boo-x and Bop-x share the same composition when the DP(x) is same.

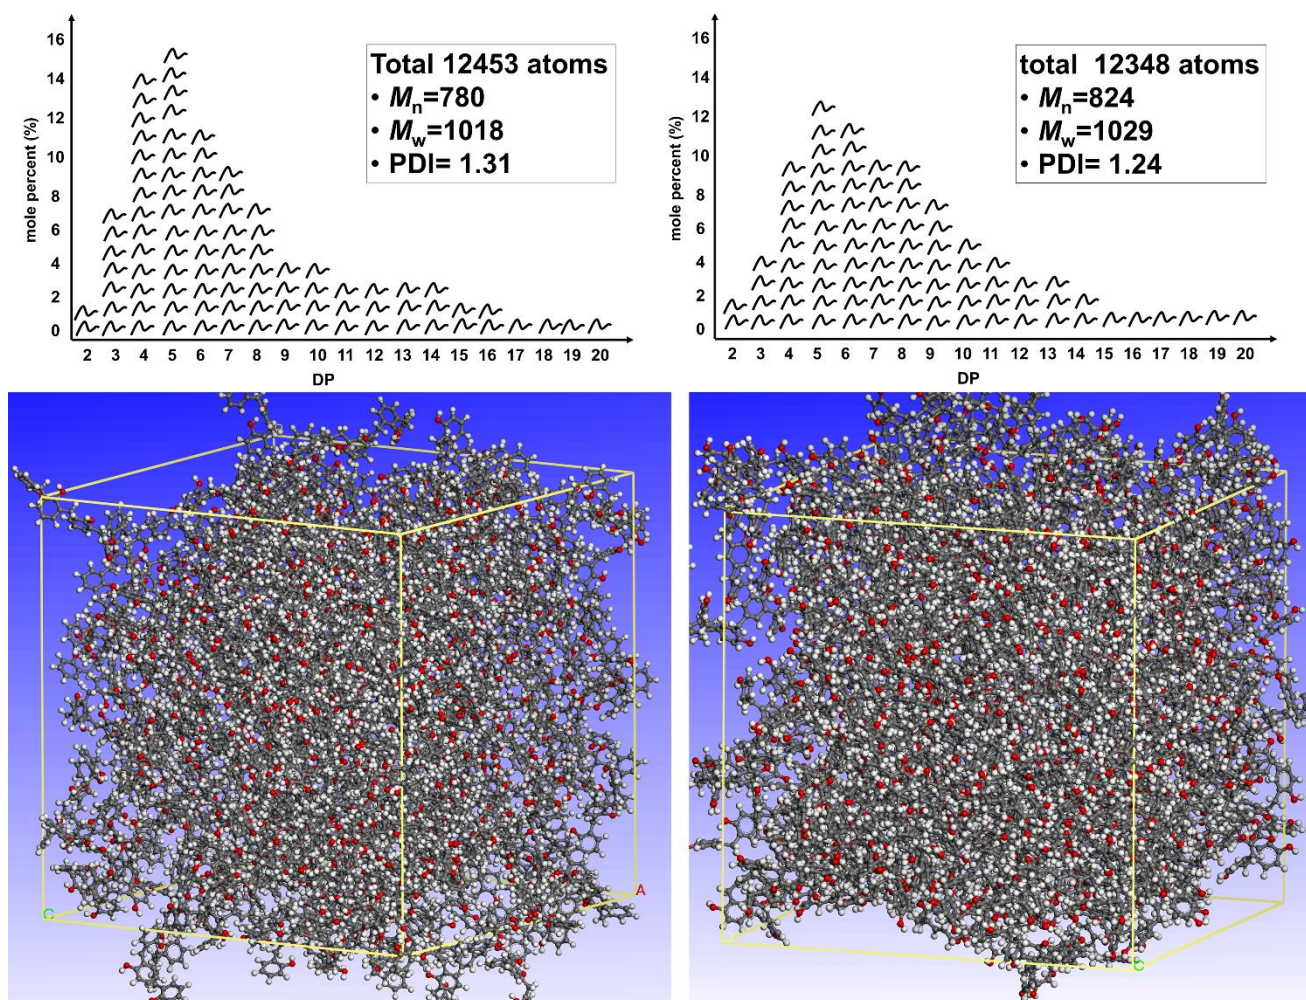

**Figure S4** Molecular weight distributions and snapshots of Boo-mix and Bop-mix

**Table S4** Equilibrated density of novolac models (300K)

| Model   | $\rho/\text{g}\cdot\text{cm}^{-3}$ | Model   | $\rho/\text{g}\cdot\text{cm}^{-3}$ |
|---------|------------------------------------|---------|------------------------------------|
| PhOH    | 1.069                              | Bop-2   | 1.186                              |
| Boo-2   | 1.176                              | Bop-3   | 1.190                              |
| Boo-3   | 1.189                              | Bop-4   | 1.218                              |
| Boo-4*  | 1.195                              | Bop-6   | 1.210                              |
| Boo-6   | 1.207                              | Bop-8   | 1.213                              |
| Boo-8   | 1.209                              | Bop-12  | 1.208                              |
| Boo-12  | 1.205                              | Bop-16  | 1.202                              |
| Boo-16  | 1.216                              | Bop-20  | 1.201                              |
| Boo-20  | 1.194                              | Bop-mix | 1.215                              |
| Boo-mix | 1.196                              |         |                                    |

\* Only the density of novolac models with  $\text{DP} \geq 4$  were compared with the density of real novolac resins.

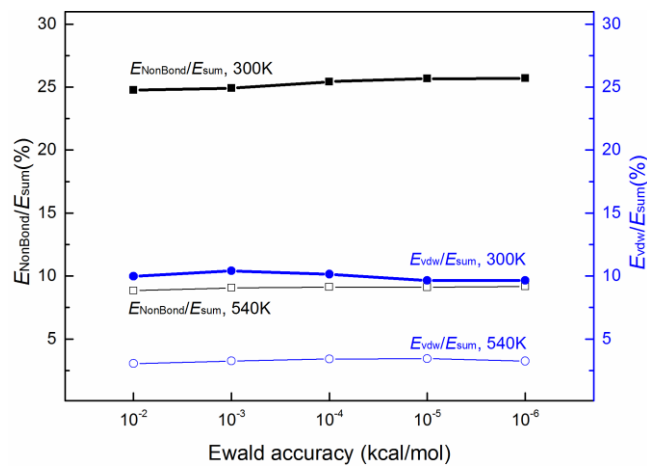

**Figure S5** The proportion of nonbond interaction energy (black dots) and van der Waals energy (blue dots) in the total energy in Boo-8, calculated at different Ewald accuracy levels (the horizontal axis). It can be seen that the plots converged around the accuracy of  $10^{-5}$  kcal/mol.

### III. Glass transition temperature

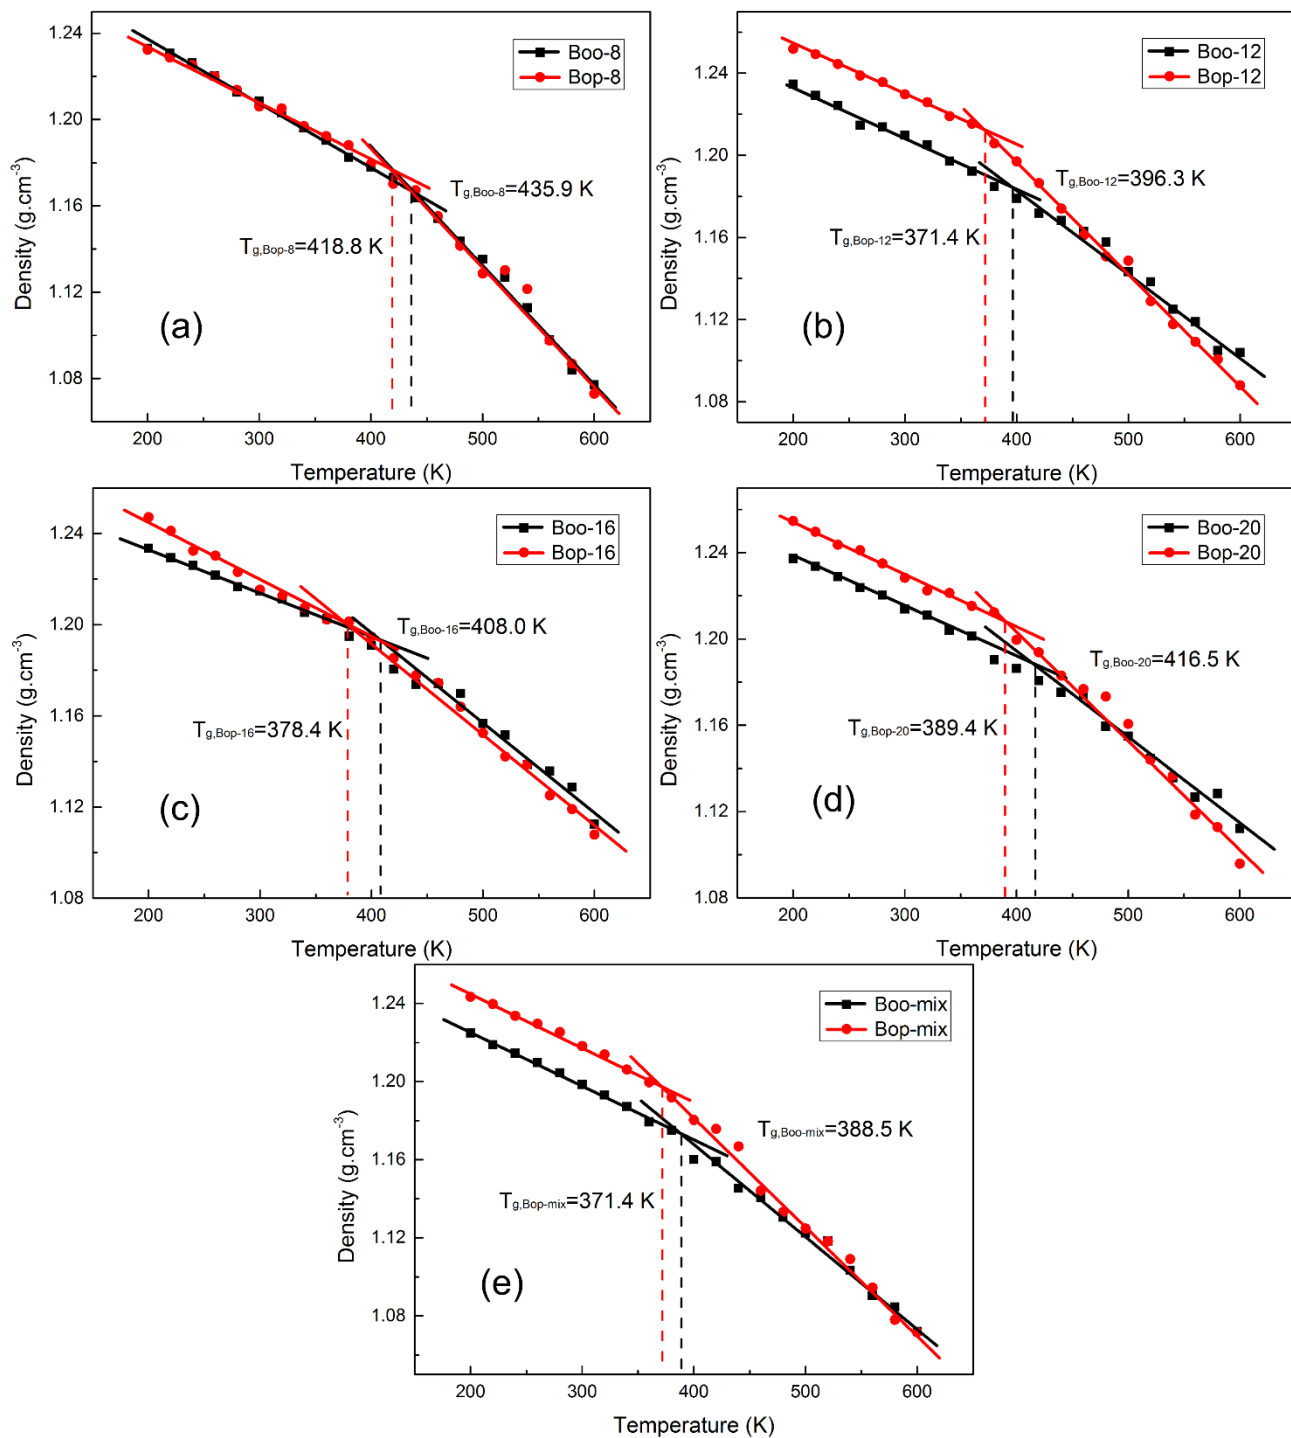

**Figure S6** Glass transition temperatures based on density~temperature relationship of Boo-8 and Bop-8

(a), Boo-12 and Bop-12 (b), Boo-16 and Bop-16 (c), Boo-20 and Bop-20 (d), Boo-mix and Bop-mix (e).

The density~temperature data were obtained from a gradually cooling down process with a cooling rate of

20 K/200 ps. Densities of the last 500 frames in 1000 frames at each temperature were averaged.

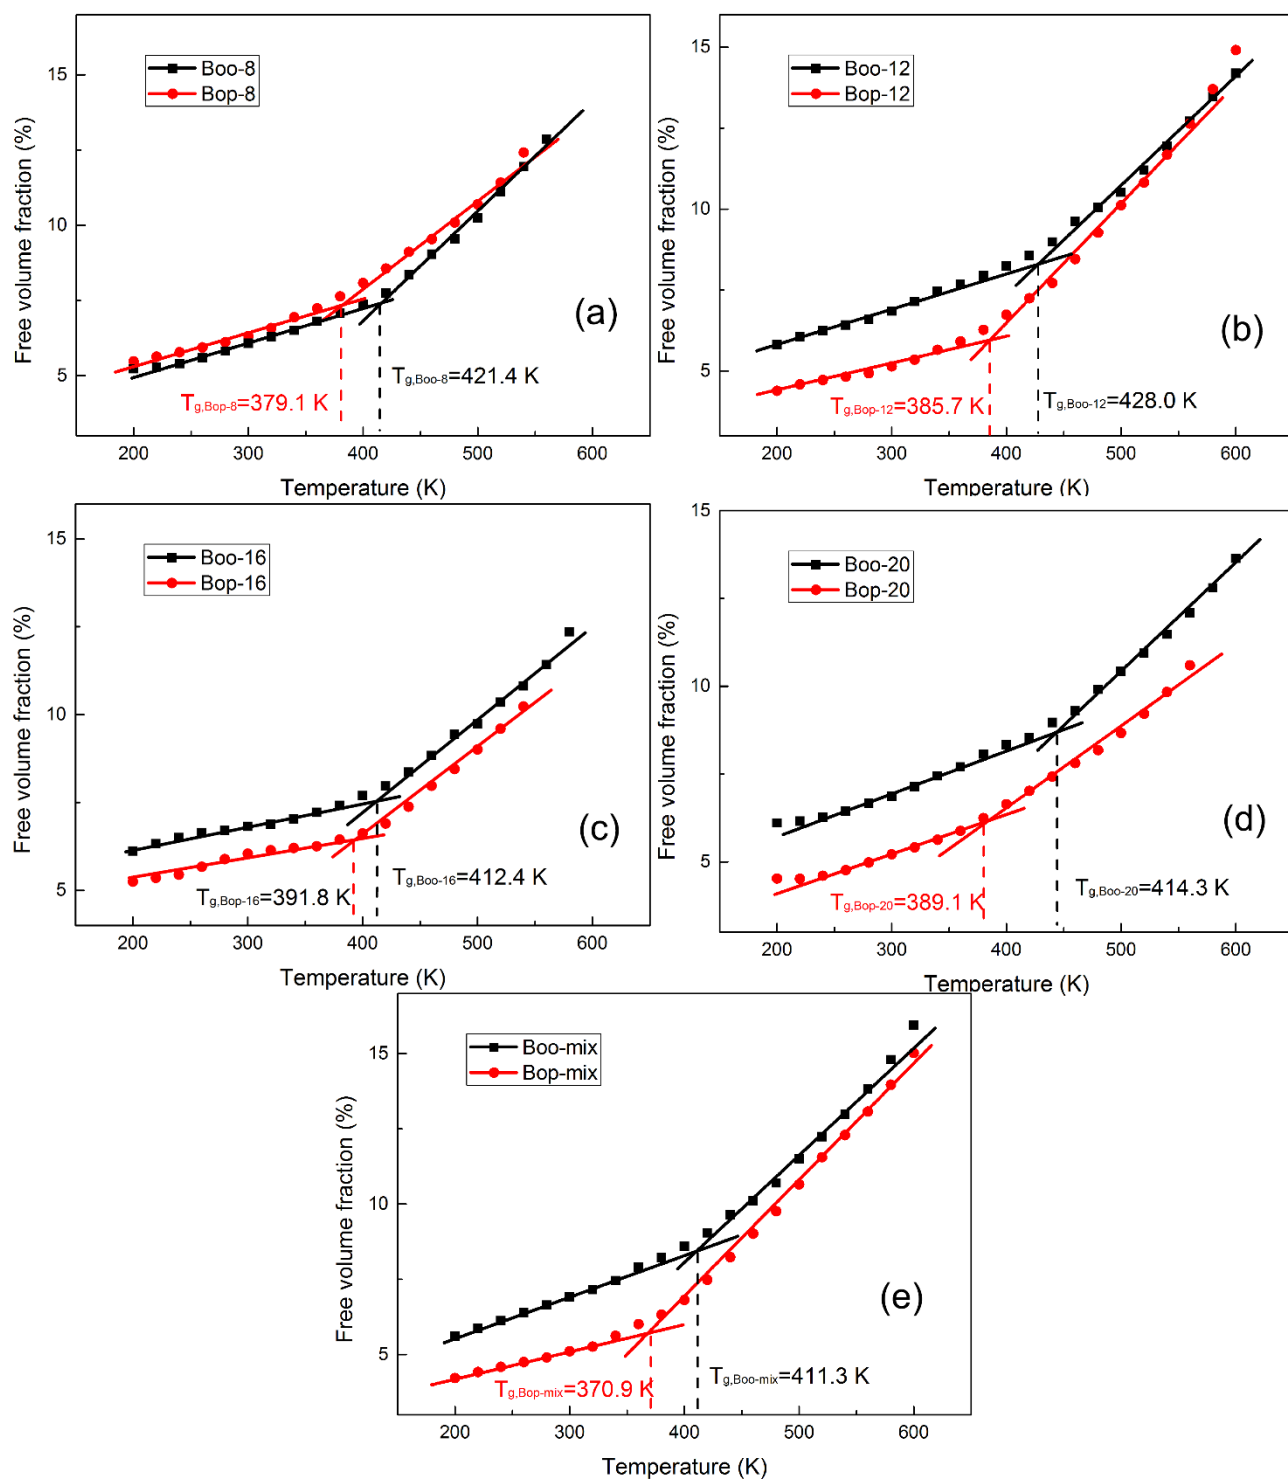

**Figure S7** The free volume fraction~temperature relationship of Boo-8 and Bop-8 (a), Boo-12 and Bop-12 (b), Boo-16 and Bop-16 (c), Boo-20 and Bop-20 (d), Boo-mix and Bop-mix (e). The free volume for each model were calculated with a probe radius of 1.4Å.



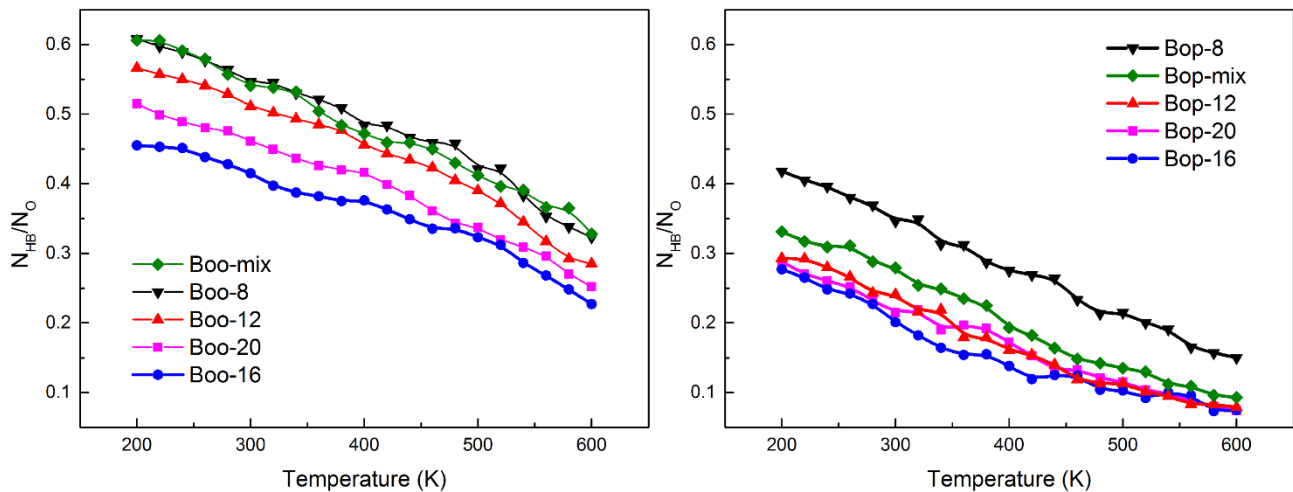

**Figure S8** The ratio of hydrogen bonds number to total oxygen number for Boo-x (left) and Bop-x (right).

There are obvious inflection points (about 400 K) in  $N_{HB}/N_O$ -temperature curve of Boo-x, while the inflection points of Bop-x curves are not significant.

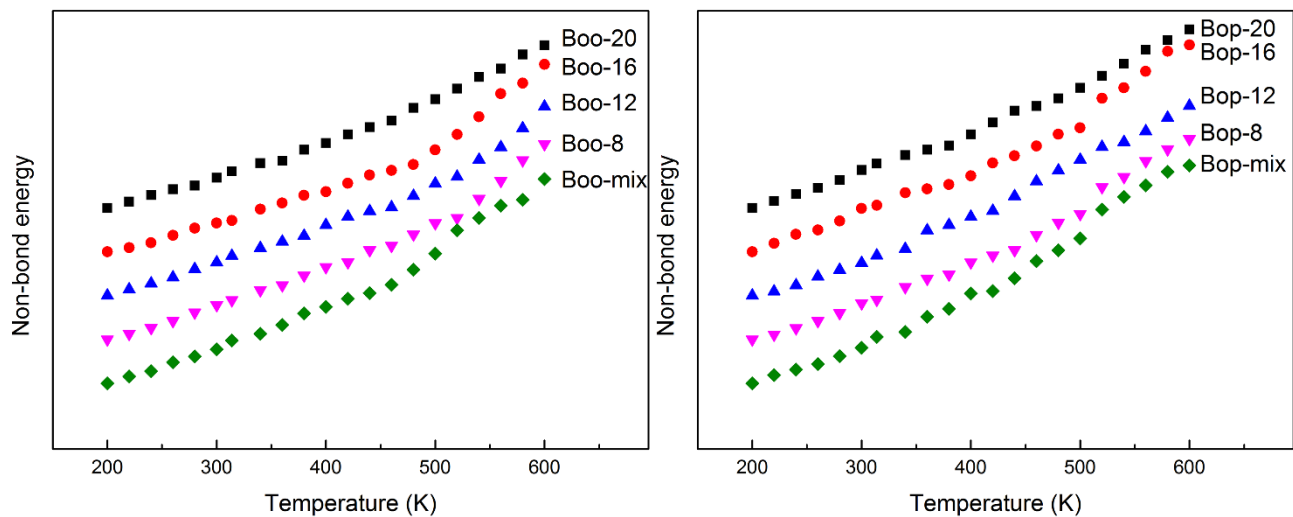

**Figure S9** Nonbond energy (including van der Waals, hydrogen bond and electrostatic energy) change during the cooling down process of Boo-x (left) and Bop-x (right). There are obvious inflection points around 500 K for DP=8~12 and Boo-mix/Bop-mix.

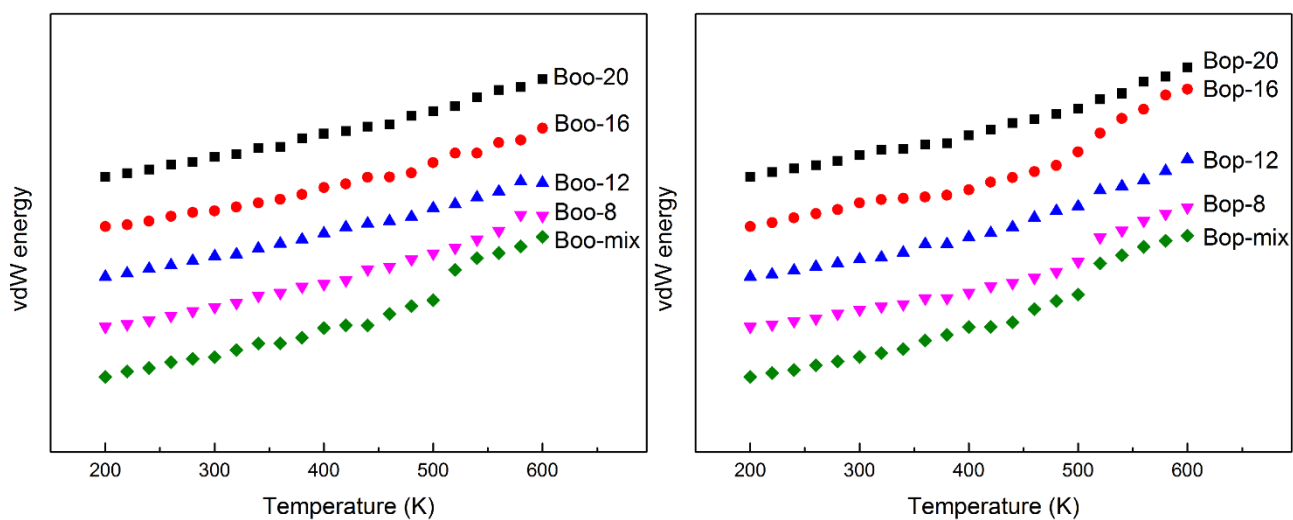

**Figure S10** Van der Waals energy change during the cooling down process of Boo-x (left) and Bop-x (right). There are obvious inflection points around 500 K for Boo-mix, Bop-mix, Bop-8 and Bop-16.

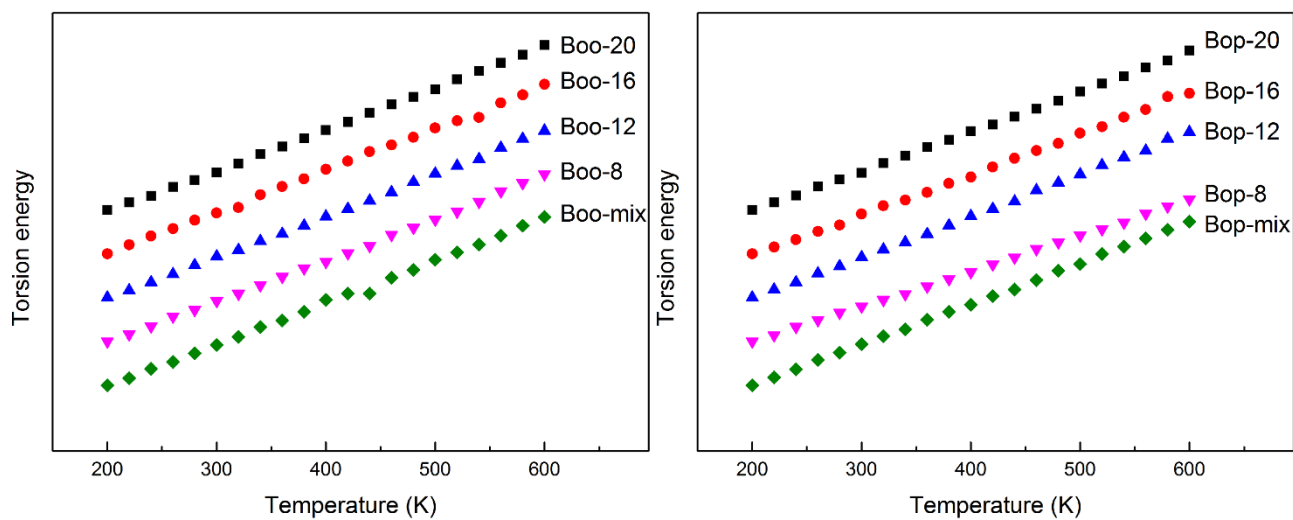

**Figure S11** Torsion energy change during the cooling down process of Boo-x (left) and Bop-x (right). There is no obvious inflection in the torsion energy~temperature curves.

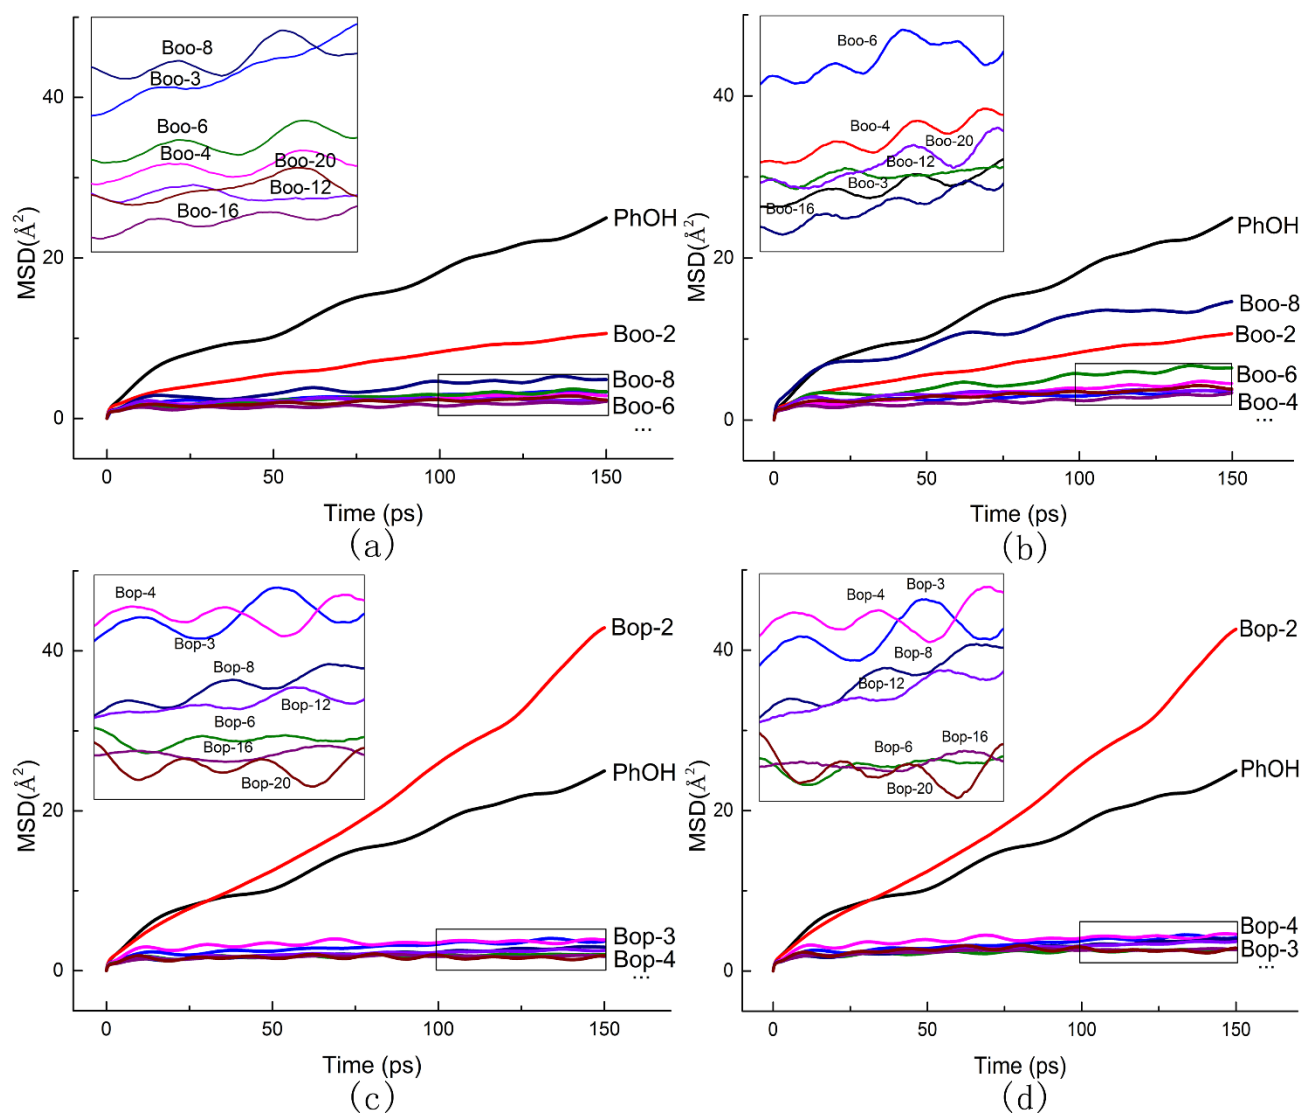

**Figure S12** MSD of atoms in novolac models at 300 K: (a) all atoms in Boo-x; (b) end phenol rings in Boo-x; (c) all atoms in Bop-x; (d) end phenol rings in Bop-x. There are obvious differences among phenol, Boo-2/Bop-2 and other novolacs. In order to observe these curves in one figure, the data at the range of 0–150 ps were adopted.

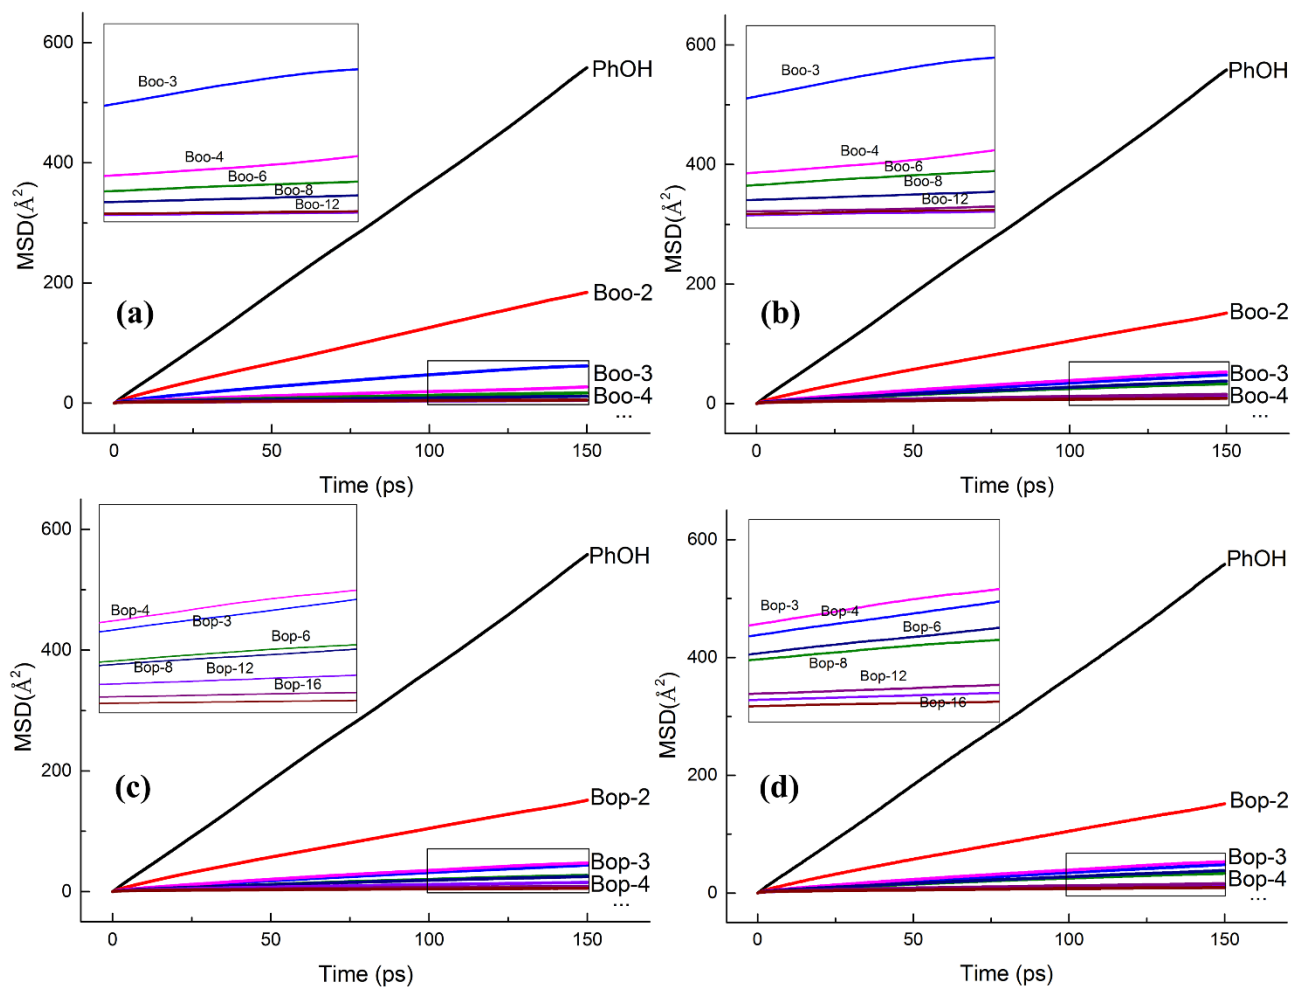

**Figure S13** MSD of atoms in novolac models at 540 K: (a) all atoms in Boo-x; (b) end phenol rings in Boo-x; (c) all atoms in Bop-x; (d) end phenol rings in Bop-x.

#### IV. Nearest coordination numbers of oxygen atoms

The nearest coordination number ( $Z$ ) is calculated with the most commonly used definition:

$$Z = 4\pi\rho_0 \int_{r_{\min}}^{r_{\max}} g(r) r^2 dr \quad (1)$$

Where  $g(r)$  is the RDF of oxygens,  $r_{\min}=2.3\text{\AA}$  and  $r_{\max}=3.4\text{\AA}$  were adopted in this study;  $\rho_0$  is the number density of oxygen atoms in each models.

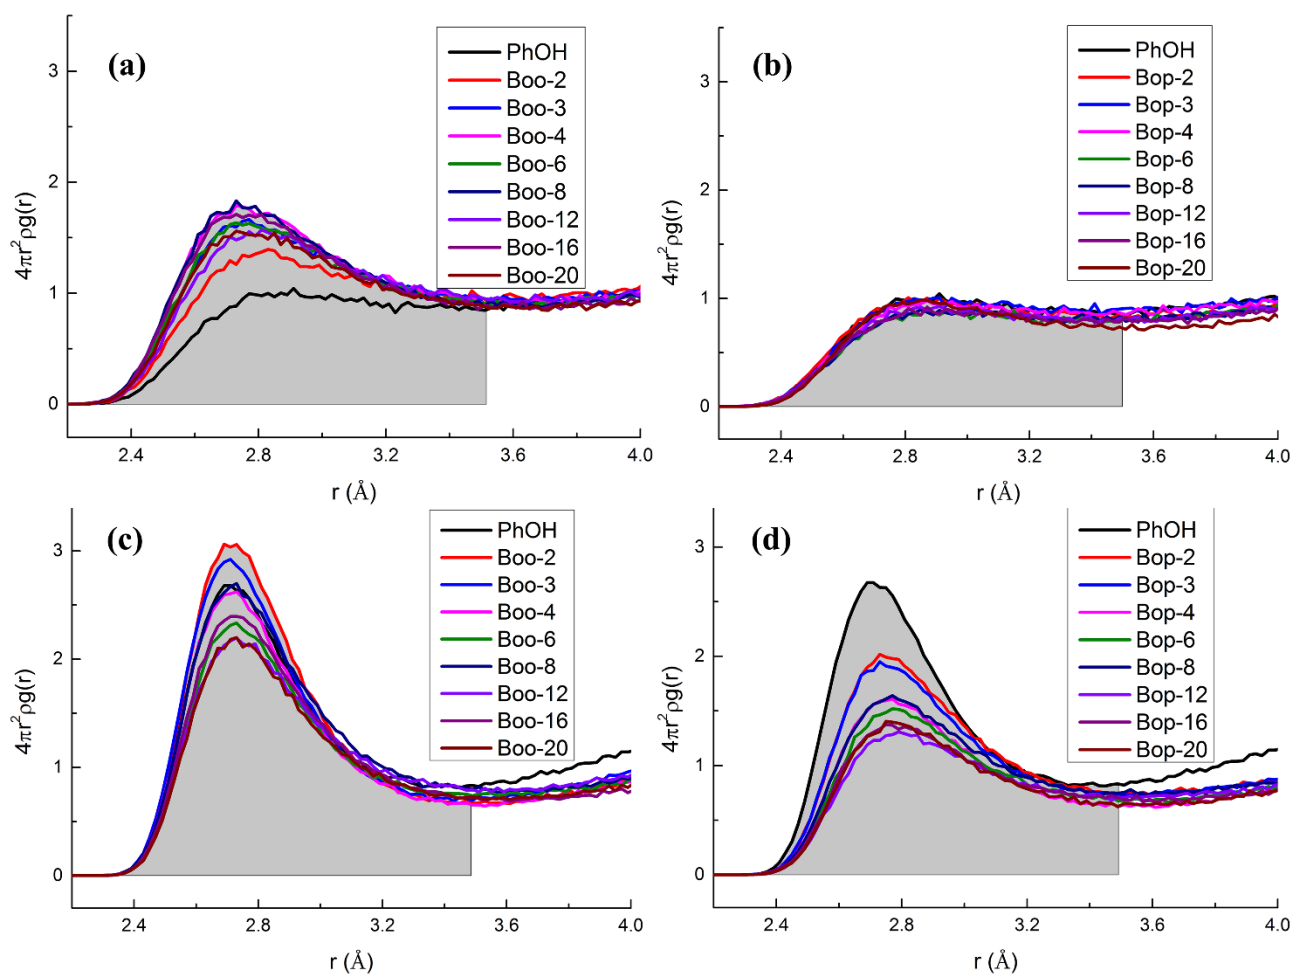

**Figure S14**  $4\pi r^2 \rho g(r)$  curve of O...O in: (a) Boo-x at 300 K; (b) Boo-x at 540 K; (c) Bop-x at 300 K; (d) Boo-x at 540 K

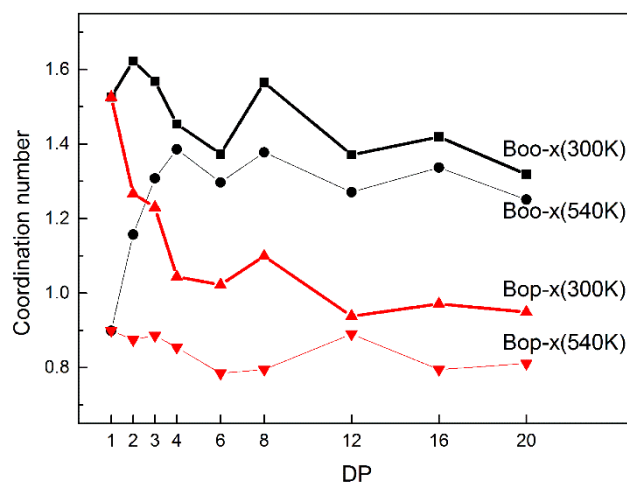

**Figure S15** Nearest coordination numbers of oxygen atoms in Boo-x and Bop-x

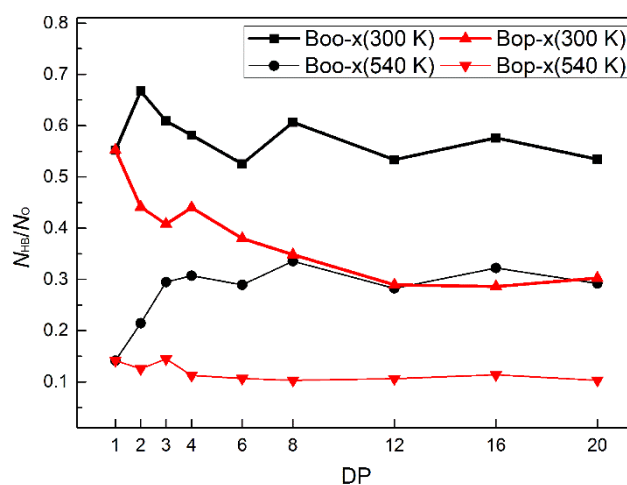

**Figure S16** Ratio of hydrogen bonds to total oxygen atoms ( $N_{HB}/N_O$ ) in novolac models

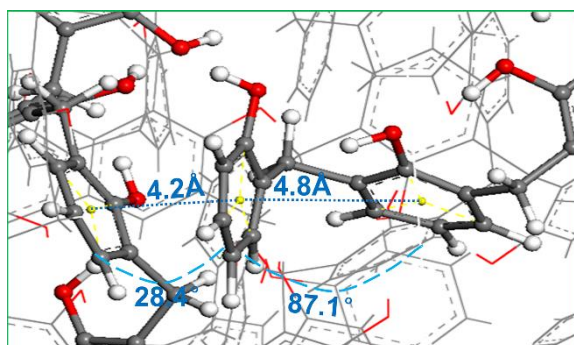

**Figure S17** Distances and angles between phenolic ring pairs in Boo-8. The typical distance between the methylene linked phenolic ring pair is 4.8Å, while 4.2Å for phenolic ring pair that are not bridged.

## V. Averaged reduced density gradient of frozen end phenolic rings

The following color codes are employed to distinguish interaction types of noncovalent interaction:

- Blue for the highly attractive interactions (such as hydrogen bonds)
- Green for the weak interactions (such as dispersive-like van der Waals)
- Red for repulsive interactions (such as steric clashes)

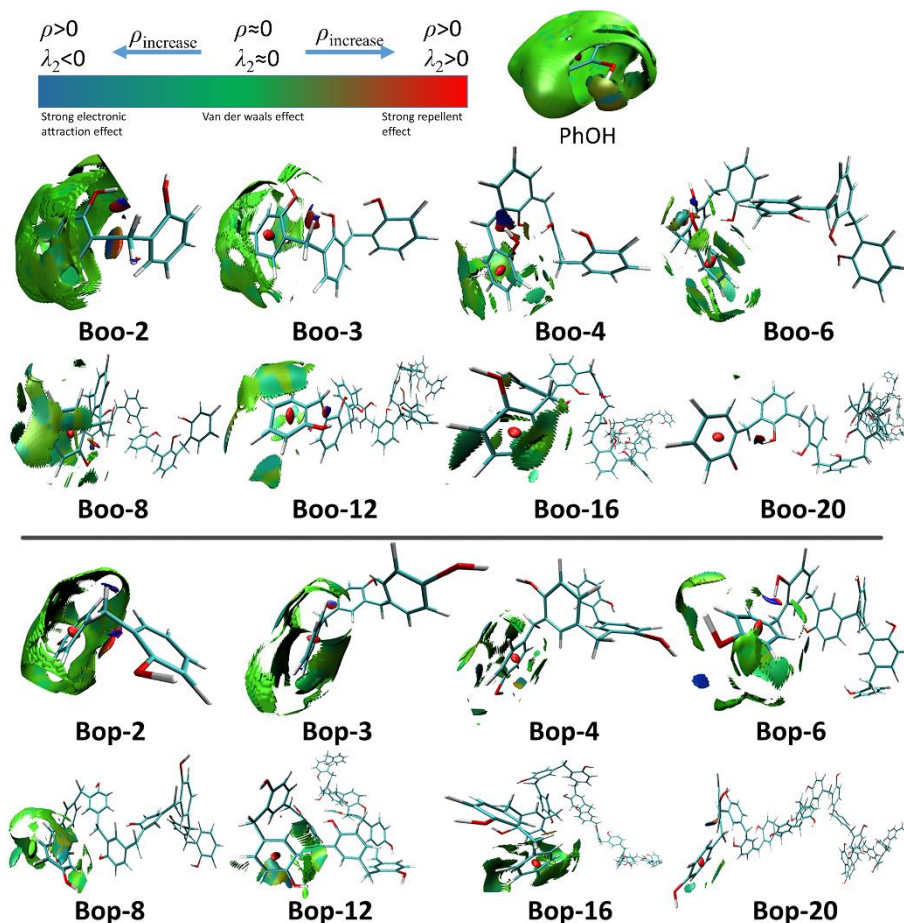

**Figure S18** Reduced density gradient isosurfaces ( $s^{\text{pro}}=0.35$ ) for interaction of frozen end phenol ring in Boo-x and Bop-x at 540 K. The surfaces are colored on a blue-green-red scale according to values of  $\text{sign}(\lambda_2)\rho$ , ranging from  $-0.06$  to  $+0.05$  au. Blue indicates strong attractive interactions, and red indicates strong nonbonded overlap.

## VI. Conformational analyses

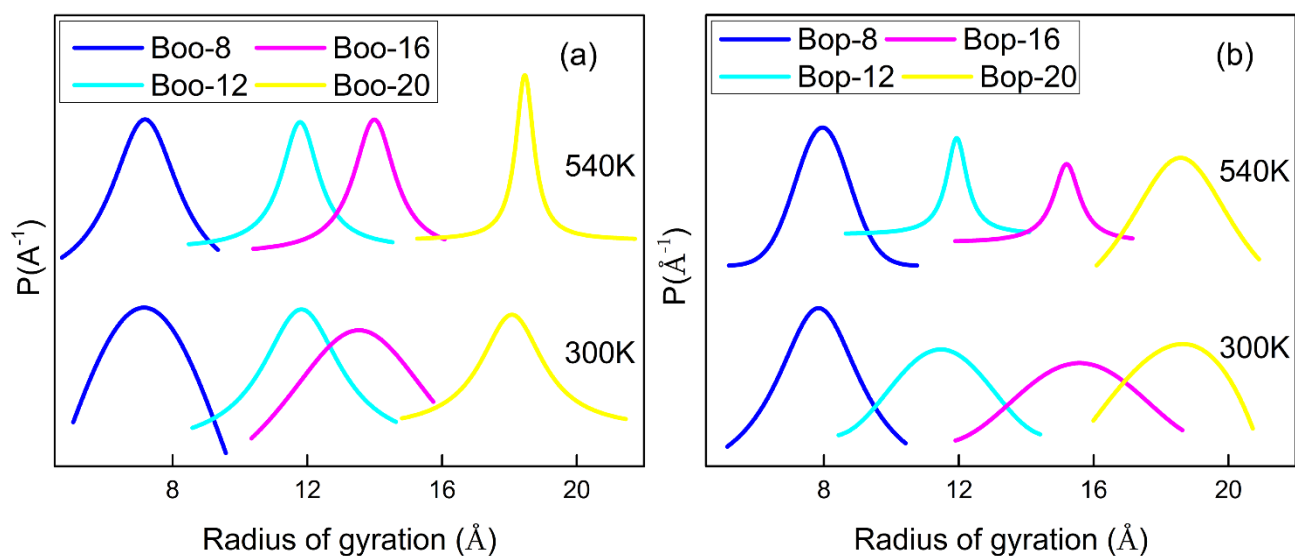

**Figure S19** Probability distribution of the radius of gyration ( $R_g$ ) of Boo-x (a) and Bop-x (b). The novolac chains, both in Boo-x and Bop-x, tend to stretch out at 540 K, lead to narrow distributed  $R_g$  distribution curves.

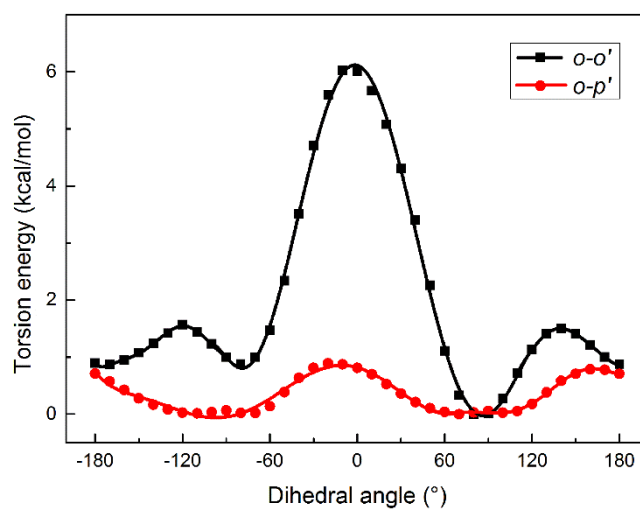

**Figure S20** The minimum energy path of the torsion energy v.s. dihedral angles in Boo-2 (black dots) and Bop-2 (red dots).



**Table S5** Boltzmann average of  $\cos\phi$  for Boo-2 and Bop-2

|       | 300 K | 540 K |
|-------|-------|-------|
| Boo-2 | 0.028 | 0.065 |
| Bop-2 | 0.120 | 0.122 |

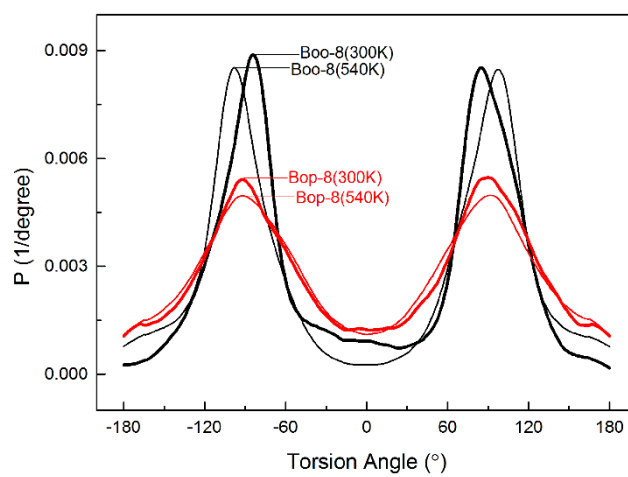

**Figure S21** Dihedral angel distribution in Boo-8 (black lines) and Bop-8 (red lines)
